# Supplementary material for: Organometallic halogen bond acceptors: directionality, hybrid cocrystal precipitation, and blueshifted CO ligand vibrational band
Source: Royal Society of Chemistry journal article supplement (doi:10.1039/c7ce02185b), 2018-01-01
Supplement: c7ce02185b1.pdf [file c7ce02185b1.pdf]

Electronic Supplementary Information

**Organometallic Halogen Bond Acceptors: Directionality, Hybrid Cocrystals  
Precipitation and a Blueshift of CO Ligand Vibrational Band.**

. Yury V. Torubaev<sup>a</sup>, Ivan V. Skabitskiy, Polina Rusina<sup>b</sup>, Alexander A. Pasynskii, Ajeet Singh<sup>c</sup>,  
Dhirendra K. Rai<sup>c</sup>,

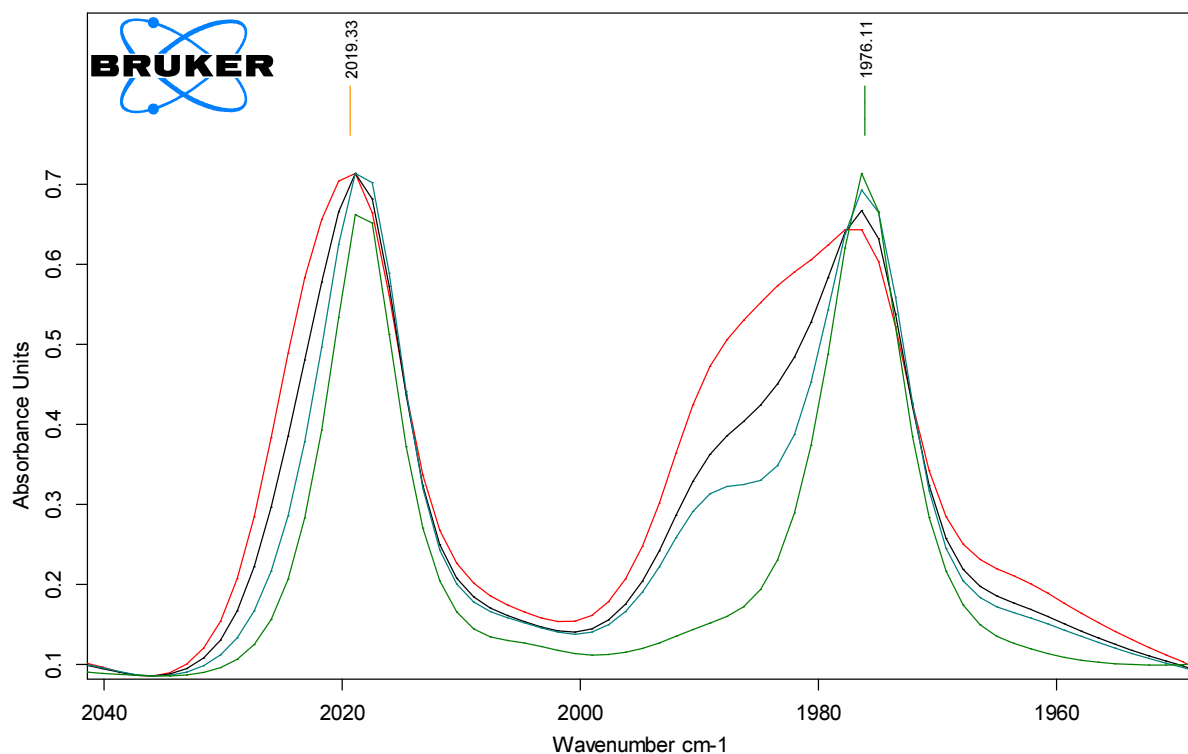

|                                                     |                              |                                    |          |
|-----------------------------------------------------|------------------------------|------------------------------------|----------|
| G:\OPUS 7.0.129\MEAS\UT_CpFeTePh_cyclohexane.0      | UT_CpFeTePh_cyclohexane      | Instrument type and / or accessory | 6/1/2017 |
| G:\OPUS 7.0.129\MEAS\UT_CpFeTePh_DITFB-01cyclohex.0 | UT_CpFeTePh_DITFB-01cyclohex | Instrument type and / or accessory | 6/5/2017 |
| G:\OPUS 7.0.129\MEAS\UT_CpFeTePh_DITFB-02cyclohex.0 | UT_CpFeTePh_DITFB-02cyclohex | Instrument type and / or accessory | 6/5/2017 |
| G:\OPUS 7.0.129\MEAS\UT_CpFeTePh_DITFB-03cyclohex.0 | UT_CpFeTePh_DITFB-03cyclohex | Instrument type and / or accessory | 6/5/2017 |

Page 1/1

**Figure 1\_es.** Unsymmetrical hypsochromic broadening (by  $\sim 4 \text{ cm}^{-1}$  half-width) of the CO band at  $2019 \text{ cm}^{-1}$  in  $\text{CpFe}(\text{CO})_2\text{TePh}$  titrated in cyclohexane against *p*-DITFB.

**Table 1\_es** Line characteristics for the Figure 1\_es

| Line | Maximum $\text{cm}^{-1}$ | Full width<br>(at half maximum), $\text{cm}^{-1}$ |
|------|--------------------------|---------------------------------------------------|
| 1    | 2018.49                  | 7.88                                              |
| 2    | 2018.32                  | 8.99                                              |
| 3    | 2018.70                  | 10.68                                             |
| 4    | 2019.33                  | 12.38                                             |

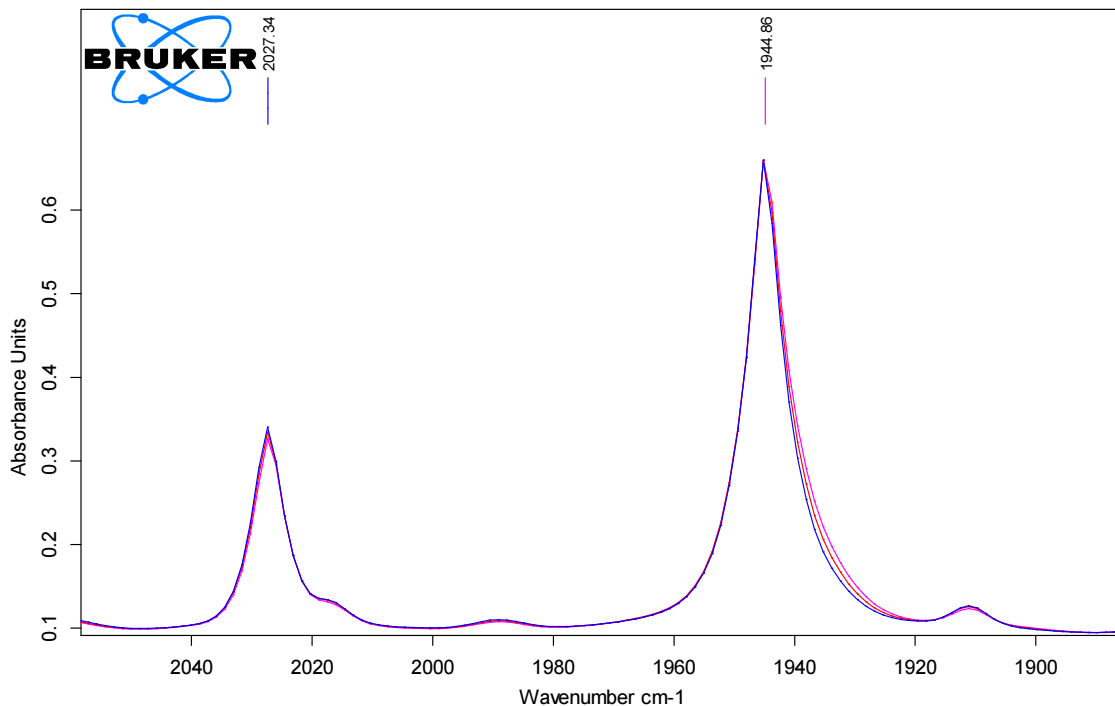

|                                              |                       |                                    |          |
|----------------------------------------------|-----------------------|------------------------------------|----------|
| G:\OPUS_7.0.129\MEAS\UT_CTM_cyclohex.0       | UT_CTM_cyclohex       | Instrument type and / or accessory | 6/5/2017 |
| G:\OPUS_7.0.129\MEAS\UT_CTM_DITFB_cyclohex.0 | UT_CTM_DITFB_cyclohex | Instrument type and / or accessory | 6/5/2017 |
| G:\OPUS_7.0.129\MEAS\UT_CTM_DITFB_cyclohex.1 | UT_CTM_DITFB_cyclohex | Instrument type and / or accessory | 6/5/2017 |

Page 1/1

**Figure 2\_es.** Unsymmetrical bathochromic broadening of the CO band at  $1945\text{ cm}^{-1}$  in  $\text{CpMn}(\text{CO})_3$  titrated in cyclohexane against *p*-DITFB

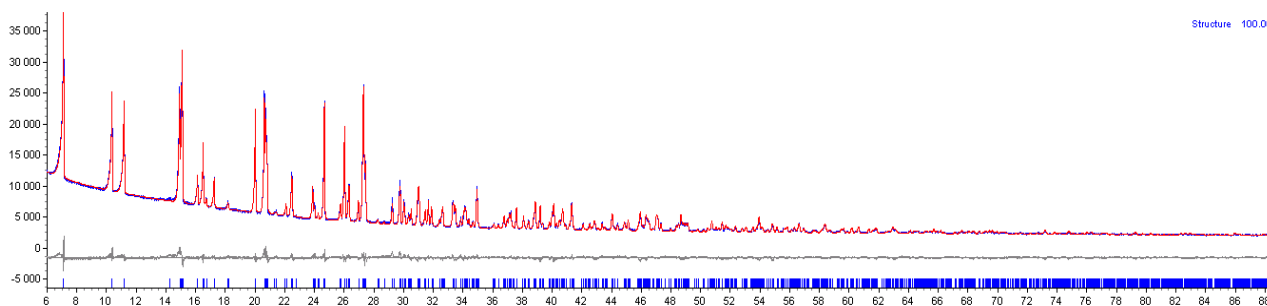

**Figure 3\_es.**

Modeling of the diffractogram of a  $\text{CpFe}(\text{CO})_2\text{TePh} / p\text{-DITFB}$  sample by the Rietveld method: Experimental (blue, for fine powder precipitated upon the mixing  $\text{CpFe}(\text{CO})_2\text{TePh}$  solution in hexane with *p*-DITFB) .calculated (red, from the single crystal XRD data for  $\text{CpFe}(\text{CO})_2\text{TePh} / p\text{-DITFB}$  cocrystals) and differential (gray) curves.

### Computations

|  | Free complex | DITFB adduct, (experiment) | shift $\text{cm}^{-1}$ | Free complex | DITFB adduct (calculated) | shift $\text{cm}^{-1}$ |
|--|--------------|----------------------------|------------------------|--------------|---------------------------|------------------------|
|--|--------------|----------------------------|------------------------|--------------|---------------------------|------------------------|

|                                       | (experiment)<br>$\nu$ , $\text{cm}^{-1}$ | $\nu$ , $\text{cm}^{-1}$           |           | (calculated)<br>$\nu$ , $\text{cm}^{-1}$ | I---X<br>I--- $\pi$ -CO<br>$\nu$ , $\text{cm}^{-1}$ |                |
|---------------------------------------|------------------------------------------|------------------------------------|-----------|------------------------------------------|-----------------------------------------------------|----------------|
| $\text{CpFe}(\text{CO})_2\text{Cl}$   | 2048, 1990                               | 2048, <b>2003</b>                  | 0, 13     | 2044, 2003                               | 2047, 2007<br>2038, 1994                            | 3, 3<br>-6, -9 |
| $\text{CpFe}(\text{CO})_2\text{I}$    | 2026, <b>1966</b> ,<br><b>1946</b>       | 2032, <b>1982</b> ,<br><b>1962</b> | 6, 16, 16 | 2034, 1997                               | 2038, 2000<br>2028, 1986                            | 4, 3<br>-6, -9 |
| $\text{CpFe}(\text{CO})_2\text{TePh}$ | 2007, 1993,<br>1936                      | 2013, 1993,<br>1941 <sup>a</sup>   | 6, 0, 5   | 2013, 1976                               | 2020, 1983<br>2007, 1965                            | 7, 7<br>-6, -9 |

**Table 1\_es.** Calculated and experimental (FTIR-ATR) CO frequencies for pure  $\text{CpFe}(\text{CO})_2\text{X}$  and its adducts with *p*-DITFB.

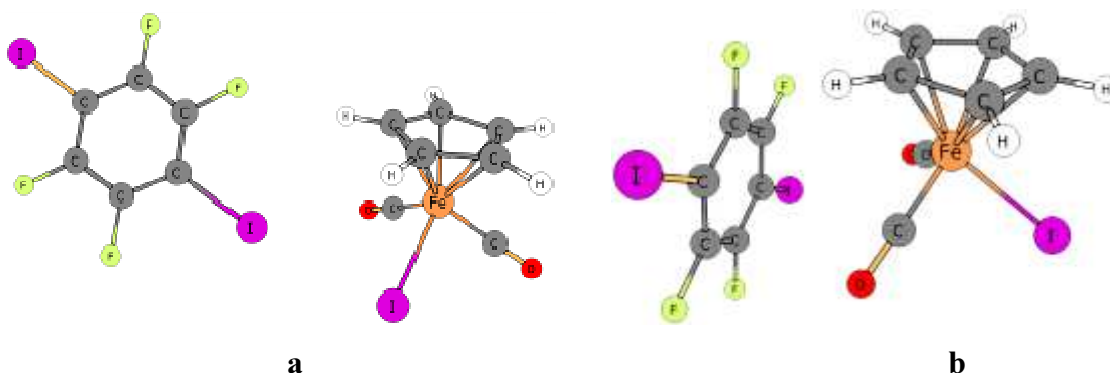

**Figure 4\_es.** Calculated geometry of  $\text{CpFe}(\text{CO})_2\text{I}(\text{DITFB})$  adducts associated through the I---I (a) and I--- $\pi(\text{CO})$  (b) halogen bonds

|                                                    | PBE0-D3<br>def2-TZVP | DLPNO-CCSD(T)<br>def2-TZVP | DLPNO-CCSD(T)<br>def2-CBS(2/3) | DLPNO-CCSD(T)<br>def2-QZVP | DLPNO-CCSD(T)<br>def2-CBS(3/4) | ZPE+thermal<br>correction to $\Delta\text{H}$ |
|----------------------------------------------------|----------------------|----------------------------|--------------------------------|----------------------------|--------------------------------|-----------------------------------------------|
| $\text{CpFe}(\text{CO})_2\text{Cl}$ (X-I)          | -8.54                | -7.87                      | -9.65                          | -8.30                      | -8.57                          | 1.76                                          |
| $\text{CpFe}(\text{CO})_2\text{Cl}$ ( $\pi$ -CO)   | -6.74                | -7.87                      | -9.24                          | -7.20                      | -7.02                          | 1.83                                          |
| $\text{CpFe}(\text{CO})_2\text{I}$ (X-I)           | -8.01                | -6.73                      | -8.45                          | -7.34                      | -7.64                          | 1.75                                          |
| $\text{CpFe}(\text{CO})_2\text{I}$ ( $\pi$ -CO)    | -6.85                | -7.67                      | -8.85                          | -7.49                      | -7.52                          | 1.22                                          |
| $\text{CpFe}(\text{CO})_2\text{TePh}$ (X-I)        | -13.77               | -9.92                      | -12.42                         | -10.66                     | -10.97                         | 1.33                                          |
| $\text{CpFe}(\text{CO})_2\text{TePh}$ ( $\pi$ -CO) | -11.64               | -11.61                     | -13.90                         | -11.93                     | -12.16                         | 0.88                                          |

**Table 2\_es.** Energies of I---X and I--- $\pi$ -CO halogen-bond complexes formation with DITFB from single point calculation on PBE/def2-TZVP geometries.

**Second order perturbation theory analysis of Fock matrix in NBO basis for  $\text{CpFe}(\text{CO})_2\text{X} \rightarrow \text{DITFB}$  donor-acceptor interaction.**

**X=Cl**

|                                                                               |               |
|-------------------------------------------------------------------------------|---------------|
| LP(Cl sp <sup>0.44</sup> ) → σ*(C sp <sup>2.66</sup> -I sp <sup>13.02</sup> ) | 0.78          |
| LP(Cl sp <sup>11.71</sup> ) → σ*(C -I)                                        | 0.12          |
| LP(Cl sp <sup>11.71</sup> ) → RY(I)                                           | 0.05          |
| <b>LP(Cl sp<sup>10.52</sup>) → σ*(C -I)</b>                                   | <b>9.23</b>   |
| LP(Cl sp <sup>10.52</sup> ) → RY(I)                                           | 0.71 (sum of) |
| σ(Fe sd <sup>2.38</sup> - Cl sp <sup>6.21</sup> ) → σ*(C -I)                  | 0.08          |
| σ(Fe sd <sup>1.85</sup> - C <sub>CO</sub> sp <sup>0.51</sup> ) → σ*(C -I)     | 0.09          |

**X=I**

|                                                                              |              |
|------------------------------------------------------------------------------|--------------|
| LP(I sp <sup>0.21</sup> ) → σ*(C sp <sup>2.69</sup> -I sp <sup>13.24</sup> ) | 0.74         |
| LP(I sp <sup>26.36</sup> ) → σ*(C - I)                                       | 0.05         |
| LP(I sp <sup>26.36</sup> ) → RY(I)                                           | 0.08         |
| LP(I sp <sup>21.54</sup> ) → σ*(C - I)                                       | <b>10.56</b> |
| LP(I sp <sup>21.54</sup> ) → RY(I)                                           | 1.21         |
| σ(Fe sd <sup>2.5</sup> - I sp <sup>10.07</sup> ) → σ*(C - I)                 | 0.10         |

**X=TePh**

|                                                                               |                                     |
|-------------------------------------------------------------------------------|-------------------------------------|
| LP(Te sp <sup>0.31</sup> ) → σ*(C sp <sup>2.73</sup> -I sp <sup>18.45</sup> ) | 1.52                                |
| <b>LP(Te sp<sup>15.03</sup>) → σ*(C-I)</b>                                    | <b>22.81</b>                        |
| LP(Te sp <sup>15.03</sup> ) → RY(I)                                           | 3.92 (sum of many Rydberg orbitals) |
| σ(Fe sd <sup>3</sup> - Te sp <sup>12.5</sup> ) → σ*(C-I)                      | 0.05                                |
| σ(C sp <sup>2.56</sup> - H s) → σ*(C-I)                                       | 0.13                                |

The same computational method that we use for our complexes (although, not perfectly exact about the absolute ν<sub>CO</sub> values) correctly reproduces the 7 cm<sup>-1</sup> shift observed in [] for [(Me<sub>5</sub>C<sub>5</sub>)Fe(CO)<sub>2</sub>I]<sub>2</sub>-I<sub>2</sub> complex.

Calculated ν, cm<sup>-1</sup> CO for Cp<sup>''</sup>Fe(CO)<sub>2</sub>I 2014, 1976

Calculated ν, cm<sup>-1</sup> CO for Cp<sup>''</sup>Fe(CO)<sub>2</sub>-I<sub>2</sub> 2023, 1985

**ATR-FTIR spectra for complexes 3-6**

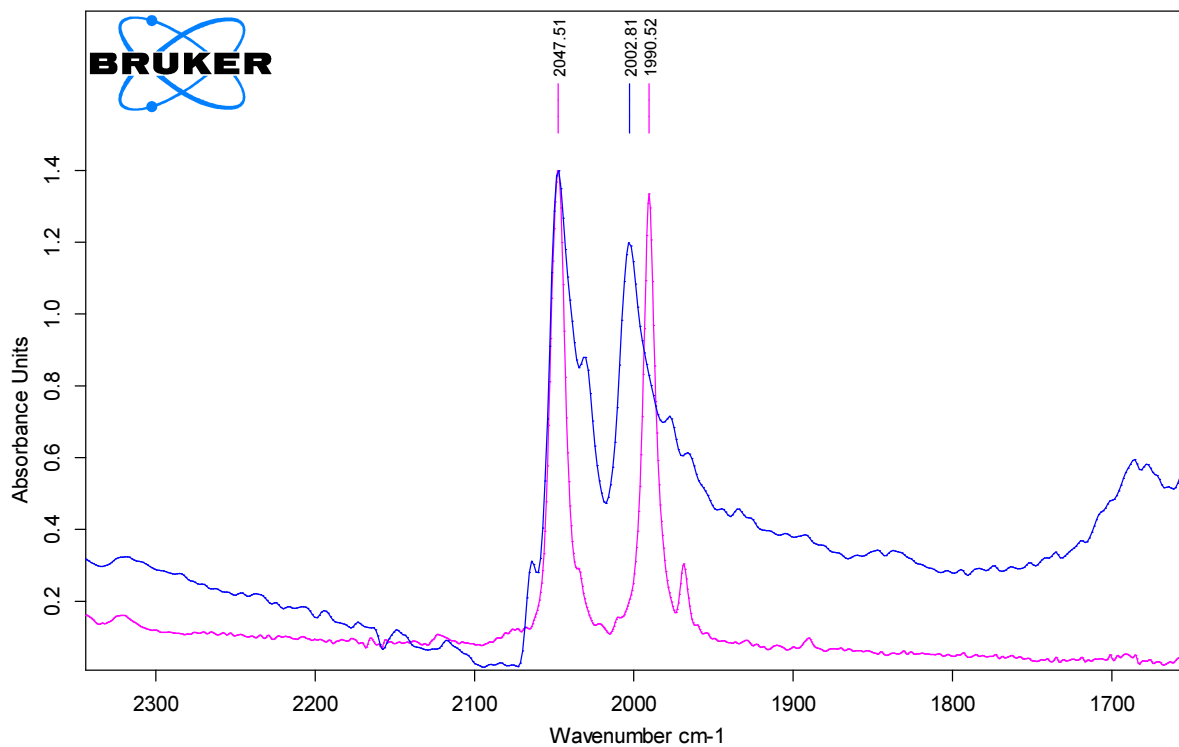

|                                                |                         |                                    |           |
|------------------------------------------------|-------------------------|------------------------------------|-----------|
| G:\OPUS_7.0.129\MEAS\UT_CpFeCl_DITFB_cocryst.0 | UT_CpFeCl_DITFB_cocryst | Instrument type and / or accessory | 4/27/2017 |
| G:\OPUS_7.0.129\MEAS\UT_CpFeCl_ditfb2.0        | UT_CpFeCl_ditfb2        | Instrument type and / or accessory | 4/19/2017 |

Page 1/1

IR spectra for CpFe(CO)<sub>2</sub>Cl and [CpFe(CO)<sub>2</sub>Cl][μ-*p*-DITFB] (complex 3)

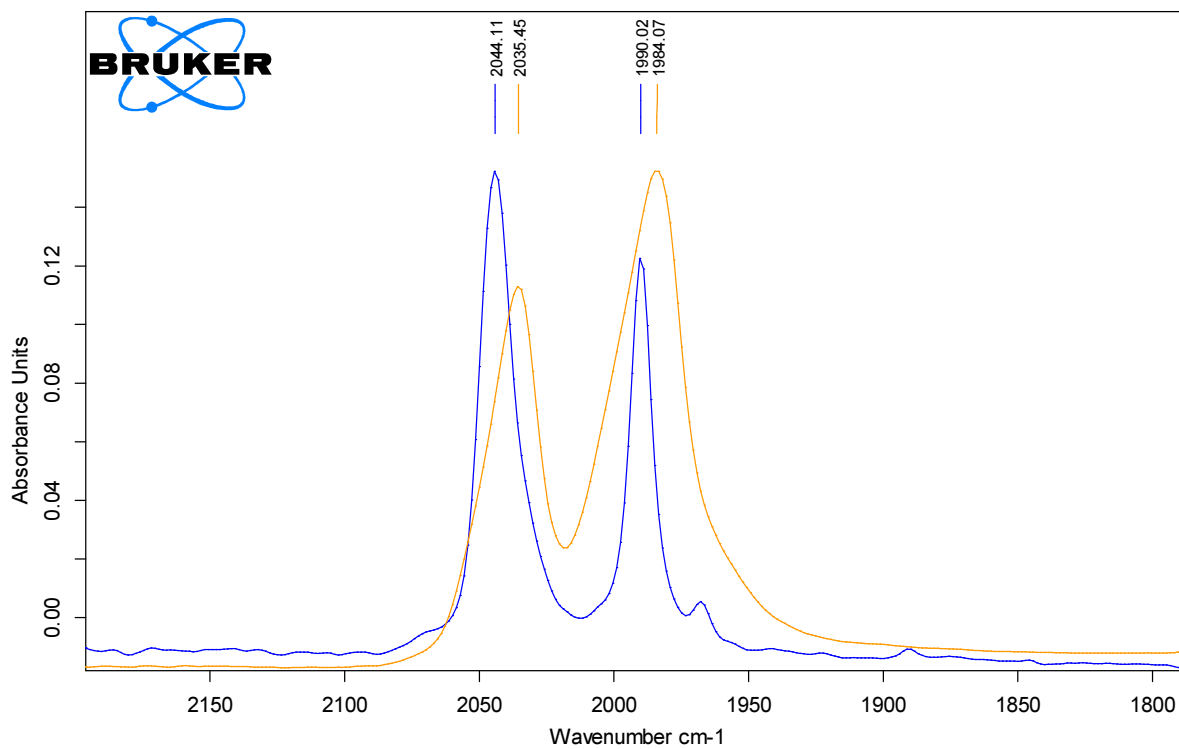

|                                  |           |                                    |           |
|----------------------------------|-----------|------------------------------------|-----------|
| G:\OPUS_7.0.129\MEAS\UT_CpFeBr.0 | UT_CpFeBr | Instrument type and / or accessory | 4/19/2017 |
| G:\OPUS_7.0.129\MEAS\UT_CpFeBr.2 | UT_CpFeBr | Instrument type and / or accessory | 4/19/2017 |

Page 1/1

IR spectra for CpFe(CO)<sub>2</sub>Br and [CpFe(CO)<sub>2</sub>Br][μ-*p*-DITFB] (complex 4)

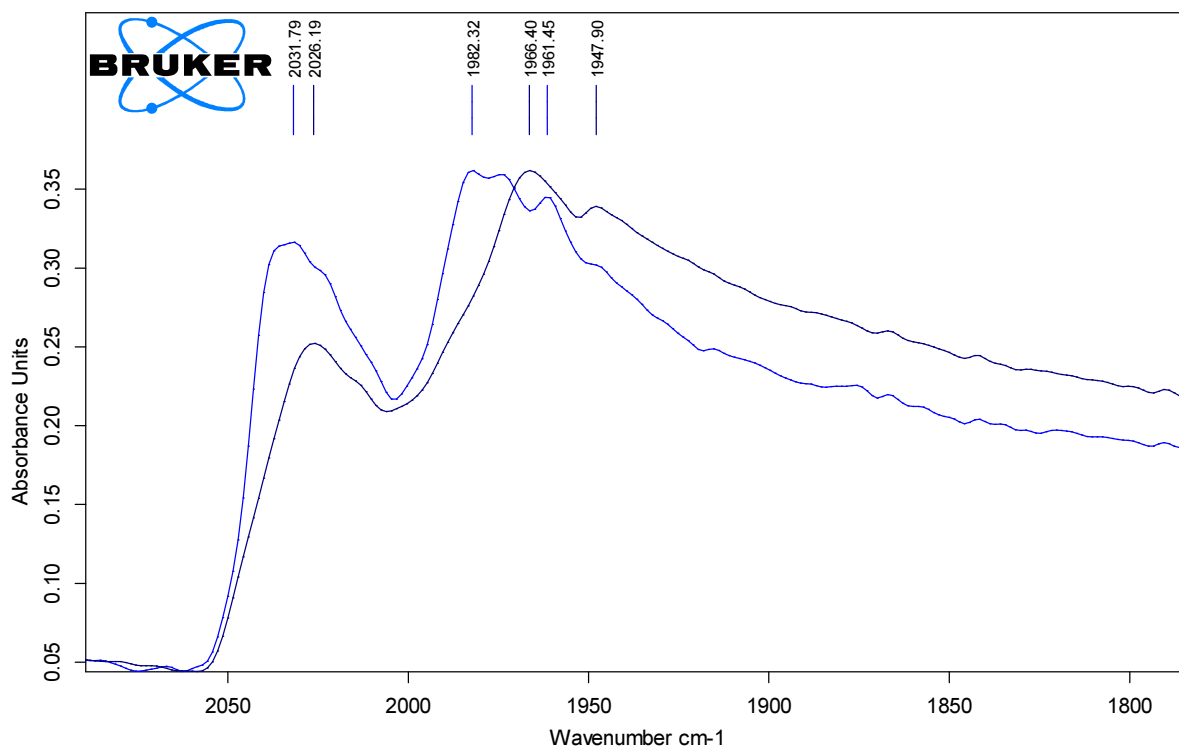

|                                               |                        |                                    |           |
|-----------------------------------------------|------------------------|------------------------------------|-----------|
| G:\OPUS_7.0.129\MEAS\UT_CpFeI_cryst.0         | UT_CpFeI_cryst         | Instrument type and / or accessory | 4/27/2017 |
| G:\OPUS_7.0.129\MEAS\UT_CpFeI_DITFB_cocryst.0 | UT_CpFeI_DITFB_cocryst | Instrument type and / or accessory | 4/27/2017 |

Page 1/1

IR spectra for  $\text{CpFe}(\text{CO})_2\text{I}$  and  $[\text{CpFe}(\text{CO})_2\text{I}][\mu\text{-}p\text{-DITFB}]$  (complex 5)

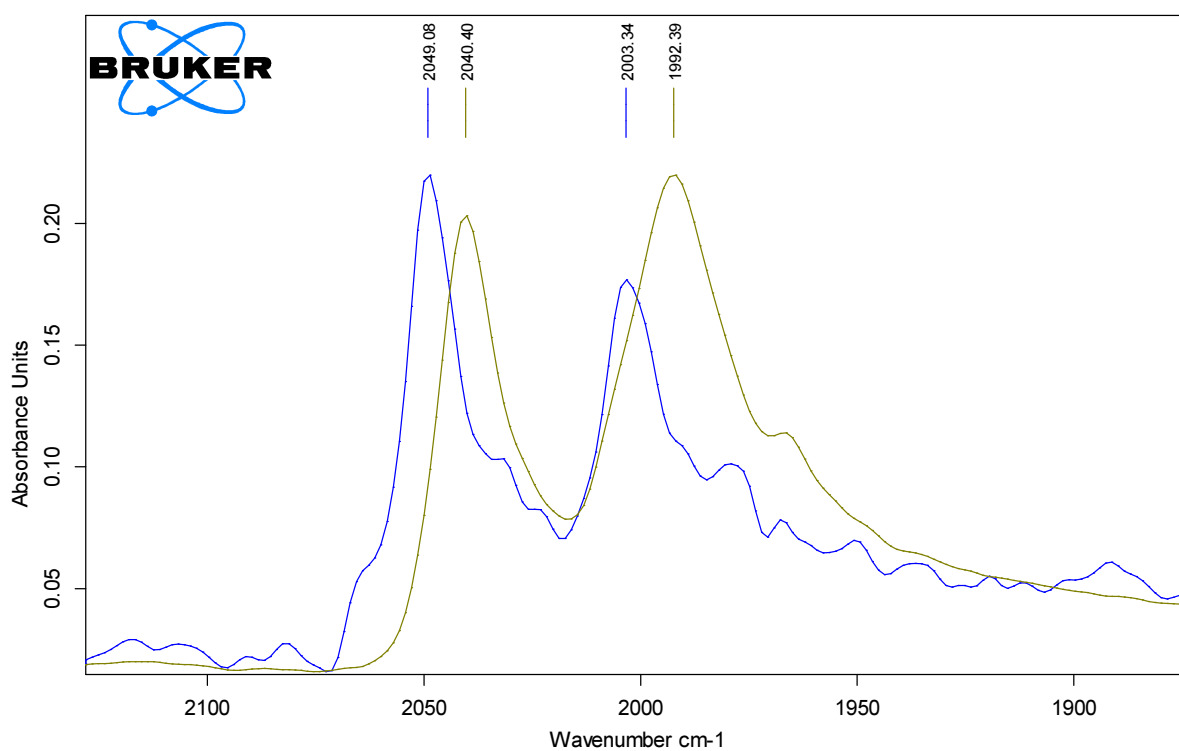

|                                               |                        |                                    |           |
|-----------------------------------------------|------------------------|------------------------------------|-----------|
| G:\OPUS_7.0.129\MEAS\UT_CbCoI_cryst.0         | UT_CbCoI_cryst         | Instrument type and / or accessory | 4/27/2017 |
| G:\OPUS_7.0.129\MEAS\UT_CbCoI_DITFB_cocryst.0 | UT_CbCoI_DITFB_cocryst | Instrument type and / or accessory | 4/27/2017 |

Page 1/1

**Crystallographic data for complexes 1-7****Complex 1.1 CpFe(CO)<sub>2</sub>TePh----*p*-DITFB****Table 3 Crystal data and structure refinement for 1\_\_CpFe-TePh-DITFB.**

|                                             |                                                                     |
|---------------------------------------------|---------------------------------------------------------------------|
| Identification code                         | 1__CpFe-TePh-DITFB                                                  |
| Empirical formula                           | C <sub>16</sub> H <sub>10</sub> F <sub>2</sub> FeIO <sub>2</sub> Te |
| Formula weight                              | 582.59                                                              |
| Temperature/K                               | 423(2)                                                              |
| Crystal system                              | monoclinic                                                          |
| Space group                                 | P2 <sub>1</sub> /c                                                  |
| a/Å                                         | 13.5280(4)                                                          |
| b/Å                                         | 11.6432(4)                                                          |
| c/Å                                         | 11.7133(4)                                                          |
| $\alpha$ /°                                 | 90                                                                  |
| $\beta$ /°                                  | 114.97                                                              |
| $\gamma$ /°                                 | 90                                                                  |
| Volume/Å <sup>3</sup>                       | 1672.45(9)                                                          |
| Z                                           | 4                                                                   |
| $\rho_{\text{calc}}$ /cm <sup>3</sup>       | 2.314                                                               |
| $\mu$ /mm <sup>-1</sup>                     | 4.482                                                               |
| F(000)                                      | 1084.0                                                              |
| Crystal size/mm <sup>3</sup>                | 0.400 × 0.300 × 0.200                                               |
| Radiation                                   | MoK $\alpha$ ( $\lambda$ = 0.71073)                                 |
| 2 $\Theta$ range for data collection/°      | 4.824 to 56.802                                                     |
| Index ranges                                | -18 ≤ h ≤ 18, -15 ≤ k ≤ 15, -15 ≤ l ≤ 15                            |
| Reflections collected                       | 17477                                                               |
| Independent reflections                     | 4178 [R <sub>int</sub> = 0.0243, R <sub>sigma</sub> = 0.0200]       |
| Data/restraints/parameters                  | 4178/0/208                                                          |
| Goodness-of-fit on F <sup>2</sup>           | 1.050                                                               |
| Final R indexes [I ≥ 2 $\sigma$ (I)]        | R <sub>1</sub> = 0.0183, wR <sub>2</sub> = 0.0409                   |
| Final R indexes [all data]                  | R <sub>1</sub> = 0.0212, wR <sub>2</sub> = 0.0420                   |
| Largest diff. peak/hole / e Å <sup>-3</sup> | 0.65/-0.55                                                          |

**Table 3.1 Bond Lengths for 1\_\_CpFe-TePh-DITFB.**

| Atom Atom   | Length/Å   | Atom Atom                | Length/Å  |
|-------------|------------|--------------------------|-----------|
| Te(1) C(8)  | 2.130 (2)  | C(13) C(12)              | 1.388 (3) |
| Te(1) Fe(1) | 2.5934 (3) | C(13) C(8)               | 1.391 (3) |
| I(1) C(14)  | 2.111 (2)  | C(8) C(9)                | 1.393 (3) |
| Fe(1) C(1)  | 1.760 (2)  | C(19) C(15) <sup>1</sup> | 1.379 (3) |
| Fe(1) C(2)  | 1.770 (2)  | C(19) C(14)              | 1.380 (3) |
| Fe(1) C(7)  | 2.088 (2)  | C(14) C(15)              | 1.383 (3) |
| Fe(1) C(3)  | 2.089 (2)  | C(9) C(10)               | 1.395 (3) |

|            |           |             |           |
|------------|-----------|-------------|-----------|
| Fe(1) C(4) | 2.103 (2) | C(12) C(11) | 1.379 (3) |
| Fe(1) C(6) | 2.104 (2) | C(11) C(10) | 1.384 (3) |
| Fe(1) C(5) | 2.114 (2) | C(4) C(5)   | 1.416 (4) |
| F(4) C(19) | 1.348 (2) | C(4) C(3)   | 1.421 (3) |
| O(2) C(2)  | 1.140 (3) | C(7) C(3)   | 1.405 (3) |
| O(1) C(1)  | 1.146 (3) | C(7) C(6)   | 1.417 (4) |
| F(1) C(15) | 1.347 (2) | C(5) C(6)   | 1.409 (4) |

<sup>1</sup>-X,1-Y,-1-Z

**Table 3.2 Bond Angles for 1\_\_CpFe-TePh-DITFB.**

| Atom Atom Atom   | Angle/°     | Atom Atom Atom                 | Angle/°     |
|------------------|-------------|--------------------------------|-------------|
| C(8) Te(1) Fe(1) | 102.16 (6)  | C(13) C(8) C(9)                | 119.1 (2)   |
| C(1) Fe(1) C(2)  | 93.68 (10)  | C(13) C(8) Te(1)               | 121.64 (16) |
| C(1) Fe(1) C(7)  | 118.98 (10) | C(9) C(8) Te(1)                | 119.01 (16) |
| C(2) Fe(1) C(7)  | 96.17 (10)  | F(4) C(19) C(15) <sup>1</sup>  | 118.80 (19) |
| C(1) Fe(1) C(3)  | 91.73 (10)  | F(4) C(19) C(14)               | 119.70 (19) |
| C(2) Fe(1) C(3)  | 128.66 (10) | C(15) <sup>1</sup> C(19) C(14) | 121.5 (2)   |
| C(7) Fe(1) C(3)  | 39.32 (10)  | C(19) C(14) C(15)              | 117.1 (2)   |
| C(1) Fe(1) C(4)  | 100.35 (10) | C(19) C(14) I(1)               | 120.82 (16) |
| C(2) Fe(1) C(4)  | 161.48 (10) | C(15) C(14) I(1)               | 122.03 (16) |
| C(7) Fe(1) C(4)  | 66.46 (10)  | C(8) C(9) C(10)                | 120.3 (2)   |
| C(3) Fe(1) C(4)  | 39.62 (9)   | C(11) C(12) C(13)              | 120.4 (2)   |
| C(1) Fe(1) C(6)  | 157.01 (10) | C(12) C(11) C(10)              | 120.0 (2)   |
| C(2) Fe(1) C(6)  | 96.71 (10)  | C(5) C(4) C(3)                 | 107.1 (2)   |
| C(7) Fe(1) C(6)  | 39.51 (10)  | C(5) C(4) Fe(1)                | 70.79 (13)  |
| C(3) Fe(1) C(6)  | 65.83 (10)  | C(3) C(4) Fe(1)                | 69.65 (13)  |
| C(4) Fe(1) C(6)  | 65.99 (10)  | F(1) C(15) C(19) <sup>1</sup>  | 118.84 (19) |
| C(1) Fe(1) C(5)  | 137.09 (11) | F(1) C(15) C(14)               | 119.74 (19) |
| C(2) Fe(1) C(5)  | 129.11 (11) | C(19) <sup>1</sup> C(15) C(14) | 121.4 (2)   |
| C(7) Fe(1) C(5)  | 66.00 (10)  | C(3) C(7) C(6)                 | 107.7 (2)   |
| C(3) Fe(1) C(5)  | 65.77 (10)  | C(3) C(7) Fe(1)                | 70.38 (13)  |
| C(4) Fe(1) C(5)  | 39.24 (10)  | C(6) C(7) Fe(1)                | 70.88 (14)  |
| C(6) Fe(1) C(5)  | 39.03 (11)  | C(11) C(10) C(9)               | 119.9 (2)   |
| C(1) Fe(1) Te(1) | 91.27 (7)   | C(6) C(5) C(4)                 | 108.4 (2)   |
| C(2) Fe(1) Te(1) | 89.08 (7)   | C(6) C(5) Fe(1)                | 70.13 (13)  |
| C(7) Fe(1) Te(1) | 148.73 (7)  | C(4) C(5) Fe(1)                | 69.98 (13)  |
| C(3) Fe(1) Te(1) | 141.81 (7)  | C(5) C(6) C(7)                 | 108.1 (2)   |
| C(4) Fe(1) Te(1) | 102.54 (7)  | C(5) C(6) Fe(1)                | 70.84 (14)  |
| C(6) Fe(1) Te(1) | 109.30 (8)  | C(7) C(6) Fe(1)                | 69.61 (13)  |
| C(5) Fe(1) Te(1) | 86.83 (7)   | C(7) C(3) C(4)                 | 108.7 (2)   |
| O(1) C(1) Fe(1)  | 176.0 (2)   | C(7) C(3) Fe(1)                | 70.30 (13)  |
| O(2) C(2) Fe(1)  | 178.2 (2)   | C(4) C(3) Fe(1)                | 70.73 (13)  |
| C(12) C(13) C(8) | 120.3 (2)   |                                |             |

<sup>1</sup>-X,1-Y,-1-Z



**Complex 2 [CpFe(CO)(μ-SPh)]<sub>2</sub>---*p*-DITFB****Table 4.1 Crystal data and structure refinement for 2\_\_DITFB\_CpFeSPh.**

|                                             |                                                               |
|---------------------------------------------|---------------------------------------------------------------|
| Identification code                         | 2__DITFB_CpFeSPh                                              |
| Empirical formula                           | C <sub>15</sub> H <sub>10</sub> F <sub>2</sub> FeIOS          |
| Formula weight                              | 459.04                                                        |
| Temperature/K                               | 150                                                           |
| Crystal system                              | triclinic                                                     |
| Space group                                 | P-1                                                           |
| a/Å                                         | 10.6870(6)                                                    |
| b/Å                                         | 11.1135(7)                                                    |
| c/Å                                         | 14.7255(9)                                                    |
| α/°                                         | 83.6840(10)                                                   |
| β/°                                         | 77.2140(10)                                                   |
| γ/°                                         | 63.1560(10)                                                   |
| Volume/Å <sup>3</sup>                       | 1521.68(16)                                                   |
| Z                                           | 4                                                             |
| ρ <sub>calc</sub> /g/cm <sup>3</sup>        | 2.004                                                         |
| μ/mm <sup>-1</sup>                          | 3.172                                                         |
| F(000)                                      | 884.0                                                         |
| Crystal size/mm <sup>3</sup>                | 0.5 × 0.2 × 0.2                                               |
| Radiation                                   | MoKα (λ = 0.71073)                                            |
| 2θ range for data collection/°              | 4.48 to 58                                                    |
| Index ranges                                | -14 ≤ h ≤ 14, -15 ≤ k ≤ 15, -19 ≤ l ≤ 20                      |
| Reflections collected                       | 17001                                                         |
| Independent reflections                     | 8058 [R <sub>int</sub> = 0.0366, R <sub>sigma</sub> = 0.0601] |
| Data/restraints/parameters                  | 8058/0/379                                                    |
| Goodness-of-fit on F <sup>2</sup>           | 0.996                                                         |
| Final R indexes [I ≥ 2σ (I)]                | R <sub>1</sub> = 0.0370, wR <sub>2</sub> = 0.0651             |
| Final R indexes [all data]                  | R <sub>1</sub> = 0.0619, wR <sub>2</sub> = 0.0731             |
| Largest diff. peak/hole / e Å <sup>-3</sup> | 0.87/-1.18                                                    |

**Table 4.2 Bond Lengths for 2\_\_DITFB\_CpFeSPh.**

| Atom  | Atom | Length/Å    | Atom   | Atom   | Length/Å  |
|-------|------|-------------|--------|--------|-----------|
| Fe(1) | S(1) | 2.2865 (10) | C(9)   | C(10)  | 1.403 (6) |
| Fe(1) | S(2) | 2.2619 (10) | C(10)  | C(11)  | 1.426 (6) |
| Fe(1) | C(1) | 1.753 (4)   | C(11)  | C(12)  | 1.382 (7) |
| Fe(1) | C(3) | 2.102 (4)   | C(12A) | C(13)  | 1.388 (6) |
| Fe(1) | C(4) | 2.100 (4)   | C(12A) | C(15A) | 1.391 (5) |
| Fe(1) | C(5) | 2.098 (4)   | C(13)  | C(14)  | 1.368 (7) |
| Fe(1) | C(6) | 2.105 (3)   | C(14)  | C(15)  | 1.380 (7) |
| Fe(1) | C(7) | 2.090 (4)   | C(15)  | C(16)  | 1.379 (6) |
| Fe(2) | S(1) | 2.2823 (10) | C(15A) | C(16)  | 1.387 (5) |
| Fe(2) | S(2) | 2.2584 (10) | C(17)  | C(18)  | 1.395 (5) |
| Fe(2) | C(2) | 1.756 (4)   | C(17)  | C(22)  | 1.384 (5) |

|             |           |                          |           |
|-------------|-----------|--------------------------|-----------|
| Fe(2) C(8)  | 2.100 (4) | C(18) C(19)              | 1.378 (5) |
| Fe(2) C(9)  | 2.099 (4) | C(19) C(20)              | 1.376 (5) |
| Fe(2) C(10) | 2.093 (4) | C(20) C(21)              | 1.375 (6) |
| Fe(2) C(11) | 2.088 (4) | C(21) C(22)              | 1.390 (5) |
| Fe(2) C(12) | 2.093 (4) | I(1) C(1F)               | 2.105 (3) |
| S(1) C(15A) | 1.791 (4) | F(1) C(6F)               | 1.351 (4) |
| S(2) C(17)  | 1.789 (3) | F(2) C(2F)               | 1.349 (4) |
| O(1) C(1)   | 1.150 (4) | C(1F) C(2F)              | 1.378 (5) |
| O(2) C(2)   | 1.152 (4) | C(1F) C(6F)              | 1.369 (5) |
| C(3) C(4)   | 1.399 (5) | C(2F) C(6F) <sup>1</sup> | 1.381 (5) |
| C(3) C(7)   | 1.429 (5) | I(2) C(4F)               | 2.073 (4) |
| C(4) C(5)   | 1.419 (5) | F(5) C(9F)               | 1.340 (4) |
| C(5) C(6)   | 1.413 (5) | F(6) C(5F)               | 1.343 (4) |
| C(6) C(7)   | 1.403 (5) | C(4F) C(5F)              | 1.377 (5) |
| C(8) C(9)   | 1.408 (6) | C(4F) C(9F)              | 1.376 (5) |
| C(8) C(12)  | 1.396 (6) | C(5F) C(9F) <sup>2</sup> | 1.383 (5) |

<sup>1</sup>2-X,2-Y,1-Z; <sup>2</sup>2-X,1-Y,1-Z

**Table 4.3 Bond Angles for 2\_\_DITFB\_CpFeSPh.**

| Atom | Atom  | Atom | Angle/°     | Atom  | Atom  | Atom  | Angle/°   |
|------|-------|------|-------------|-------|-------|-------|-----------|
| S(2) | Fe(1) | S(1) | 79.94 (3)   | C(4)  | C(3)  | Fe(1) | 70.4 (2)  |
| C(1) | Fe(1) | S(1) | 91.98 (11)  | C(4)  | C(3)  | C(7)  | 107.8 (3) |
| C(1) | Fe(1) | S(2) | 95.25 (11)  | C(7)  | C(3)  | Fe(1) | 69.6 (2)  |
| C(1) | Fe(1) | C(3) | 94.91 (15)  | C(3)  | C(4)  | Fe(1) | 70.7 (2)  |
| C(1) | Fe(1) | C(4) | 126.04 (16) | C(3)  | C(4)  | C(5)  | 108.5 (3) |
| C(1) | Fe(1) | C(5) | 160.48 (15) | C(5)  | C(4)  | Fe(1) | 70.2 (2)  |
| C(1) | Fe(1) | C(6) | 130.65 (15) | C(4)  | C(5)  | Fe(1) | 70.3 (2)  |
| C(1) | Fe(1) | C(7) | 96.92 (15)  | C(6)  | C(5)  | Fe(1) | 70.6 (2)  |
| C(3) | Fe(1) | S(1) | 155.82 (11) | C(6)  | C(5)  | C(4)  | 107.4 (3) |
| C(3) | Fe(1) | S(2) | 122.30 (11) | C(5)  | C(6)  | Fe(1) | 70.1 (2)  |
| C(3) | Fe(1) | C(6) | 65.82 (14)  | C(7)  | C(6)  | Fe(1) | 69.9 (2)  |
| C(4) | Fe(1) | S(1) | 141.93 (11) | C(7)  | C(6)  | C(5)  | 108.6 (3) |
| C(4) | Fe(1) | S(2) | 93.14 (11)  | C(3)  | C(7)  | Fe(1) | 70.5 (2)  |
| C(4) | Fe(1) | C(3) | 38.90 (14)  | C(6)  | C(7)  | Fe(1) | 71.0 (2)  |
| C(4) | Fe(1) | C(6) | 65.77 (14)  | C(6)  | C(7)  | C(3)  | 107.7 (3) |
| C(5) | Fe(1) | S(1) | 104.06 (11) | C(9)  | C(8)  | Fe(2) | 70.4 (2)  |
| C(5) | Fe(1) | S(2) | 98.41 (10)  | C(12) | C(8)  | Fe(2) | 70.3 (2)  |
| C(5) | Fe(1) | C(3) | 65.97 (15)  | C(12) | C(8)  | C(9)  | 107.6 (4) |
| C(5) | Fe(1) | C(4) | 39.51 (14)  | C(8)  | C(9)  | Fe(2) | 70.5 (2)  |
| C(5) | Fe(1) | C(6) | 39.29 (14)  | C(10) | C(9)  | Fe(2) | 70.2 (2)  |
| C(6) | Fe(1) | S(1) | 92.28 (11)  | C(10) | C(9)  | C(8)  | 108.4 (4) |
| C(6) | Fe(1) | S(2) | 133.85 (11) | C(9)  | C(10) | Fe(2) | 70.7 (2)  |
| C(7) | Fe(1) | S(1) | 116.29 (11) | C(9)  | C(10) | C(11) | 106.9 (4) |
| C(7) | Fe(1) | S(2) | 159.23 (11) | C(11) | C(10) | Fe(2) | 69.9 (2)  |
| C(7) | Fe(1) | C(3) | 39.84 (14)  | C(10) | C(11) | Fe(2) | 70.2 (2)  |
| C(7) | Fe(1) | C(4) | 66.10 (15)  | C(12) | C(11) | Fe(2) | 70.9 (2)  |

|        |       |       |             |        |        |                    |           |
|--------|-------|-------|-------------|--------|--------|--------------------|-----------|
| C(7)   | Fe(1) | C(5)  | 66.15 (14)  | C(12)  | C(11)  | C(10)              | 108.1 (4) |
| C(7)   | Fe(1) | C(6)  | 39.06 (14)  | C(8)   | C(12)  | Fe(2)              | 70.8 (2)  |
| S(2)   | Fe(2) | S(1)  | 80.10 (3)   | C(11)  | C(12)  | Fe(2)              | 70.5 (3)  |
| C(2)   | Fe(2) | S(1)  | 96.43 (11)  | C(11)  | C(12)  | C(8)               | 109.0 (4) |
| C(2)   | Fe(2) | S(2)  | 92.24 (11)  | C(13)  | C(12A) | C(15A)             | 120.3 (4) |
| C(2)   | Fe(2) | C(8)  | 160.35 (16) | C(14)  | C(13)  | C(12A)             | 120.7 (5) |
| C(2)   | Fe(2) | C(9)  | 131.94 (16) | C(13)  | C(14)  | C(15)              | 119.1 (4) |
| C(2)   | Fe(2) | C(10) | 97.82 (16)  | C(16)  | C(15)  | C(14)              | 121.0 (5) |
| C(2)   | Fe(2) | C(11) | 95.15 (17)  | C(12A) | C(15A) | S(1)               | 121.8 (3) |
| C(2)   | Fe(2) | C(12) | 125.69 (18) | C(16)  | C(15A) | S(1)               | 119.6 (3) |
| C(8)   | Fe(2) | S(1)  | 100.84 (12) | C(16)  | C(15A) | C(12A)             | 118.6 (4) |
| C(8)   | Fe(2) | S(2)  | 99.86 (11)  | C(15)  | C(16)  | C(15A)             | 120.2 (4) |
| C(9)   | Fe(2) | S(1)  | 90.94 (11)  | C(18)  | C(17)  | S(2)               | 120.6 (3) |
| C(9)   | Fe(2) | S(2)  | 135.76 (12) | C(22)  | C(17)  | S(2)               | 120.0 (3) |
| C(9)   | Fe(2) | C(8)  | 39.19 (15)  | C(22)  | C(17)  | C(18)              | 119.2 (3) |
| C(10)  | Fe(2) | S(1)  | 117.29 (14) | C(19)  | C(18)  | C(17)              | 120.0 (4) |
| C(10)  | Fe(2) | S(2)  | 158.50 (14) | C(20)  | C(19)  | C(18)              | 120.6 (4) |
| C(10)  | Fe(2) | C(8)  | 65.90 (16)  | C(21)  | C(20)  | C(19)              | 119.8 (4) |
| C(10)  | Fe(2) | C(9)  | 39.12 (15)  | C(20)  | C(21)  | C(22)              | 120.3 (4) |
| C(10)  | Fe(2) | C(12) | 65.78 (18)  | C(17)  | C(22)  | C(21)              | 120.0 (4) |
| C(11)  | Fe(2) | S(1)  | 155.89 (13) | C(2F)  | C(1F)  | I(1)               | 120.6 (2) |
| C(11)  | Fe(2) | S(2)  | 120.50 (15) | C(6F)  | C(1F)  | I(1)               | 121.7 (3) |
| C(11)  | Fe(2) | C(8)  | 65.37 (17)  | C(6F)  | C(1F)  | C(2F)              | 117.6 (3) |
| C(11)  | Fe(2) | C(9)  | 65.73 (16)  | F(2)   | C(2F)  | C(1F)              | 120.7 (3) |
| C(11)  | Fe(2) | C(10) | 39.87 (18)  | F(2)   | C(2F)  | C(6F) <sup>1</sup> | 118.4 (3) |
| C(11)  | Fe(2) | C(12) | 38.60 (18)  | C(1F)  | C(2F)  | C(6F) <sup>1</sup> | 120.9 (3) |
| C(12)  | Fe(2) | S(1)  | 137.67 (15) | F(1)   | C(6F)  | C(1F)              | 119.6 (3) |
| C(12)  | Fe(2) | S(2)  | 92.94 (13)  | F(1)   | C(6F)  | C(2F) <sup>1</sup> | 118.9 (3) |
| C(12)  | Fe(2) | C(8)  | 38.89 (17)  | C(1F)  | C(6F)  | C(2F) <sup>1</sup> | 121.5 (3) |
| C(12)  | Fe(2) | C(9)  | 65.33 (16)  | C(5F)  | C(4F)  | I(2)               | 121.3 (3) |
| Fe(2)  | S(1)  | Fe(1) | 97.54 (4)   | C(9F)  | C(4F)  | I(2)               | 121.4 (3) |
| C(15A) | S(1)  | Fe(1) | 109.25 (12) | C(9F)  | C(4F)  | C(5F)              | 117.3 (3) |
| C(15A) | S(1)  | Fe(2) | 112.70 (13) | F(6)   | C(5F)  | C(4F)              | 119.8 (4) |
| Fe(2)  | S(2)  | Fe(1) | 98.95 (4)   | F(6)   | C(5F)  | C(9F) <sup>2</sup> | 118.7 (4) |
| C(17)  | S(2)  | Fe(1) | 112.71 (12) | C(4F)  | C(5F)  | C(9F) <sup>2</sup> | 121.5 (3) |
| C(17)  | S(2)  | Fe(2) | 112.38 (12) | F(5)   | C(9F)  | C(4F)              | 120.8 (4) |
| O(1)   | C(1)  | Fe(1) | 178.3 (3)   | F(5)   | C(9F)  | C(5F) <sup>2</sup> | 118.0 (4) |
| O(2)   | C(2)  | Fe(2) | 177.7 (3)   | C(4F)  | C(9F)  | C(5F) <sup>2</sup> | 121.2 (4) |

<sup>1</sup>2-X,2-Y,1-Z; <sup>2</sup>2-X,1-Y,1-Z

**Complex 3 CpFe(CO)<sub>2</sub>Cl---*p*-DITFB****Table 5.1 Crystal data and structure refinement for 3\_\_DITFB\_CpFeCl.**

|                                             |                                                                                 |
|---------------------------------------------|---------------------------------------------------------------------------------|
| Identification code                         | 3__DITFB_CpFeCl                                                                 |
| Empirical formula                           | C <sub>13</sub> H <sub>5</sub> ClF <sub>4</sub> FeI <sub>2</sub> O <sub>2</sub> |
| Formula weight                              | 614.27                                                                          |
| Temperature/K                               | 423(2)                                                                          |
| Crystal system                              | Orthorhombic                                                                    |
| Space group                                 | Pbca                                                                            |
| a/Å                                         | 19.16(3)                                                                        |
| b/Å                                         | 7.157(11)                                                                       |
| c/Å                                         | 24.99(4)                                                                        |
| α/°                                         | 90                                                                              |
| β/°                                         | 90                                                                              |
| γ/°                                         | 90                                                                              |
| Volume/Å <sup>3</sup>                       | 3426(9)                                                                         |
| Z                                           | 8                                                                               |
| ρ <sub>calc</sub> /cm <sup>3</sup>          | 2.382                                                                           |
| μ/mm <sup>-1</sup>                          | 4.682                                                                           |
| F(000)                                      | 2272.0                                                                          |
| Crystal size/mm <sup>3</sup>                | 0.600 × 0.200 × 0.200                                                           |
| Radiation                                   | MoKα (λ = 0.71073)                                                              |
| 2θ range for data collection/°              | 3.26 to 57.986                                                                  |
| Index ranges                                | -26 ≤ h ≤ 25, -9 ≤ k ≤ 9, -33 ≤ l ≤ 34                                          |
| Reflections collected                       | 25857                                                                           |
| Independent reflections                     | 4542 [R <sub>int</sub> = 0.0488, R <sub>sigma</sub> = 0.0340]                   |
| Data/restraints/parameters                  | 4542/0/208                                                                      |
| Goodness-of-fit on F <sup>2</sup>           | 1.009                                                                           |
| Final R indexes [I ≥ 2σ (I)]                | R <sub>1</sub> = 0.0290, wR <sub>2</sub> = 0.0561                               |
| Final R indexes [all data]                  | R <sub>1</sub> = 0.0491, wR <sub>2</sub> = 0.0631                               |
| Largest diff. peak/hole / e Å <sup>-3</sup> | 0.74/-0.52                                                                      |

**Table 5.2 Bond Lengths for 3\_\_DITFB\_CpFeCl.**

| Atom  | Atom  | Length/Å  | Atom  | Atom  | Length/Å  |
|-------|-------|-----------|-------|-------|-----------|
| I(1)  | C(8)  | 2.103 (4) | C(8)  | C(9)  | 1.383 (5) |
| I(2)  | C(11) | 2.104 (4) | C(8)  | C(13) | 1.397 (5) |
| Fe(1) | C(1)  | 1.801 (4) | O(1)  | C(1)  | 1.144 (4) |
| Fe(1) | C(2)  | 1.814 (4) | C(2)  | O(2)  | 1.137 (5) |
| Fe(1) | C(4)  | 2.102 (5) | C(13) | C(12) | 1.382 (5) |
| Fe(1) | C(5)  | 2.102 (5) | C(11) | C(10) | 1.389 (5) |
| Fe(1) | C(6)  | 2.119 (4) | C(11) | C(12) | 1.396 (5) |
| Fe(1) | C(3)  | 2.124 (5) | C(10) | C(9)  | 1.390 (5) |
| Fe(1) | C(7)  | 2.130 (5) | C(6)  | C(7)  | 1.410 (6) |
| Fe(1) | Cl(1) | 2.318 (3) | C(6)  | C(5)  | 1.425 (6) |

|      |       |           |      |      |           |
|------|-------|-----------|------|------|-----------|
| F(4) | C(13) | 1.363 (4) | C(7) | C(3) | 1.411 (6) |
| F(2) | C(10) | 1.357 (4) | C(3) | C(4) | 1.431 (6) |
| F(3) | C(12) | 1.355 (4) | C(4) | C(5) | 1.408 (6) |
| F(1) | C(9)  | 1.357 (4) |      |      |           |

**Table 5.3 Bond Angles for 3\_\_DITFB\_CpFeCl.**

| Atom  | Atom  | Atom  | Angle/°     | Atom  | Atom  | Atom  | Angle/°   |
|-------|-------|-------|-------------|-------|-------|-------|-----------|
| C(1)  | Fe(1) | C(2)  | 95.5 (2)    | O(1)  | C(1)  | Fe(1) | 177.7 (4) |
| C(1)  | Fe(1) | C(4)  | 120.26 (18) | F(4)  | C(13) | C(12) | 117.8 (3) |
| C(2)  | Fe(1) | C(4)  | 92.3 (2)    | F(4)  | C(13) | C(8)  | 120.0 (3) |
| C(1)  | Fe(1) | C(5)  | 90.81 (19)  | C(12) | C(13) | C(8)  | 122.2 (3) |
| C(2)  | Fe(1) | C(5)  | 122.82 (18) | C(10) | C(11) | C(12) | 116.6 (3) |
| C(4)  | Fe(1) | C(5)  | 39.14 (17)  | C(10) | C(11) | I(2)  | 120.7 (3) |
| C(1)  | Fe(1) | C(6)  | 97.36 (19)  | C(12) | C(11) | I(2)  | 122.7 (3) |
| C(2)  | Fe(1) | C(6)  | 157.99 (18) | F(2)  | C(10) | C(11) | 120.2 (3) |
| C(4)  | Fe(1) | C(6)  | 65.77 (19)  | F(2)  | C(10) | C(9)  | 118.0 (3) |
| C(5)  | Fe(1) | C(6)  | 39.47 (17)  | C(11) | C(10) | C(9)  | 121.8 (3) |
| C(1)  | Fe(1) | C(3)  | 156.76 (17) | F(3)  | C(12) | C(13) | 118.6 (3) |
| C(2)  | Fe(1) | C(3)  | 96.7 (2)    | F(3)  | C(12) | C(11) | 120.1 (3) |
| C(4)  | Fe(1) | C(3)  | 39.58 (17)  | C(13) | C(12) | C(11) | 121.3 (3) |
| C(5)  | Fe(1) | C(3)  | 65.97 (19)  | C(7)  | C(6)  | C(5)  | 107.7 (4) |
| C(6)  | Fe(1) | C(3)  | 65.52 (19)  | C(7)  | C(6)  | Fe(1) | 71.1 (2)  |
| C(1)  | Fe(1) | C(7)  | 133.03 (18) | C(5)  | C(6)  | Fe(1) | 69.6 (2)  |
| C(2)  | Fe(1) | C(7)  | 131.42 (18) | C(6)  | C(7)  | C(3)  | 108.9 (4) |
| C(4)  | Fe(1) | C(7)  | 65.44 (19)  | C(6)  | C(7)  | Fe(1) | 70.2 (2)  |
| C(5)  | Fe(1) | C(7)  | 65.48 (19)  | C(3)  | C(7)  | Fe(1) | 70.4 (2)  |
| C(6)  | Fe(1) | C(7)  | 38.76 (16)  | C(7)  | C(3)  | C(4)  | 107.2 (4) |
| C(3)  | Fe(1) | C(7)  | 38.75 (16)  | C(7)  | C(3)  | Fe(1) | 70.9 (2)  |
| C(1)  | Fe(1) | Cl(1) | 90.28 (15)  | C(4)  | C(3)  | Fe(1) | 69.4 (2)  |
| C(2)  | Fe(1) | Cl(1) | 90.41 (16)  | F(1)  | C(9)  | C(8)  | 120.3 (3) |
| C(4)  | Fe(1) | Cl(1) | 148.87 (13) | F(1)  | C(9)  | C(10) | 117.9 (3) |
| C(5)  | Fe(1) | Cl(1) | 146.46 (13) | C(8)  | C(9)  | C(10) | 121.8 (3) |
| C(6)  | Fe(1) | Cl(1) | 107.25 (15) | C(5)  | C(4)  | C(3)  | 108.3 (4) |
| C(3)  | Fe(1) | Cl(1) | 109.31 (16) | C(5)  | C(4)  | Fe(1) | 70.4 (2)  |
| C(7)  | Fe(1) | Cl(1) | 89.93 (17)  | C(3)  | C(4)  | Fe(1) | 71.0 (2)  |
| C(9)  | C(8)  | C(13) | 116.3 (3)   | C(4)  | C(5)  | C(6)  | 108.0 (4) |
| C(9)  | C(8)  | I(1)  | 121.4 (3)   | C(4)  | C(5)  | Fe(1) | 70.4 (2)  |
| C(13) | C(8)  | I(1)  | 122.2 (3)   | C(6)  | C(5)  | Fe(1) | 70.9 (2)  |
| O(2)  | C(2)  | Fe(1) | 179.0 (4)   |       |       |       |           |

## Complex 4 CpFe(CO)<sub>2</sub>Br----*p*-DITFB

**Table 6.1 Crystal data and structure refinement for 4\_\_DITFB\_CpFeBr.**

|                                             |                                                                                 |
|---------------------------------------------|---------------------------------------------------------------------------------|
| Identification code                         | 4__DITFB_CpFeBr                                                                 |
| Empirical formula                           | C <sub>13</sub> H <sub>5</sub> BrF <sub>4</sub> FeI <sub>2</sub> O <sub>2</sub> |
| Formula weight                              | 658.73                                                                          |
| Temperature/K                               | 423(2)                                                                          |
| Crystal system                              | Orthorhombic                                                                    |
| Space group                                 | Pbca                                                                            |
| a/Å                                         | 19.1299(9)                                                                      |
| b/Å                                         | 7.1259(3)                                                                       |
| c/Å                                         | 25.1867(12)                                                                     |
| α/°                                         | 90                                                                              |
| β/°                                         | 90                                                                              |
| γ/°                                         | 90                                                                              |
| Volume/Å <sup>3</sup>                       | 3433.4(3)                                                                       |
| Z                                           | 8                                                                               |
| ρ <sub>calc</sub> /cm <sup>3</sup>          | 2.549                                                                           |
| μ/mm <sup>-1</sup>                          | 6.844                                                                           |
| F(000)                                      | 2416.0                                                                          |
| Crystal size/mm <sup>3</sup>                | 0.800 × 0.500 × 0.200                                                           |
| Radiation                                   | MoKα (λ = 0.71073)                                                              |
| 2θ range for data collection/°              | 5.348 to 57.994                                                                 |
| Index ranges                                | -25 ≤ h ≤ 26, -9 ≤ k ≤ 9, -34 ≤ l ≤ 34                                          |
| Reflections collected                       | 33312                                                                           |
| Independent reflections                     | 4547 [R <sub>int</sub> = 0.0358, R <sub>sigma</sub> = 0.0216]                   |
| Data/restraints/parameters                  | 4547/0/208                                                                      |
| Goodness-of-fit on F <sup>2</sup>           | 1.049                                                                           |
| Final R indexes [I ≥ 2σ (I)]                | R <sub>1</sub> = 0.0227, wR <sub>2</sub> = 0.0468                               |
| Final R indexes [all data]                  | R <sub>1</sub> = 0.0316, wR <sub>2</sub> = 0.0499                               |
| Largest diff. peak/hole / e Å <sup>-3</sup> | 0.85/-0.87                                                                      |

**Table 6.2 Bond Lengths for 4\_\_DITFB\_CpFeBr.**

| Atom  | Atom  | Length/Å  | Atom  | Atom | Length/Å  |
|-------|-------|-----------|-------|------|-----------|
| I(1)  | C(8)  | 2.089 (2) | Fe(1) | C(2) | 1.787 (3) |
| I(2)  | C(11) | 2.092 (2) | Fe(1) | C(3) | 2.072 (3) |
| F(1)  | C(9)  | 1.344 (3) | Fe(1) | C(4) | 2.073 (3) |
| F(2)  | C(10) | 1.344 (3) | Fe(1) | C(5) | 2.088 (3) |
| F(3)  | C(12) | 1.346 (3) | Fe(1) | C(7) | 2.095 (3) |
| F(4)  | C(13) | 1.347 (3) | Fe(1) | C(6) | 2.107 (3) |
| C(8)  | C(9)  | 1.374 (4) | O(1)  | C(1) | 1.141 (4) |
| C(8)  | C(13) | 1.385 (4) | O(2)  | C(2) | 1.136 (4) |
| C(9)  | C(10) | 1.383 (4) | C(3)  | C(4) | 1.403 (4) |
| C(10) | C(11) | 1.379 (4) | C(3)  | C(7) | 1.419 (5) |
| C(11) | C(12) | 1.386 (4) | C(4)  | C(5) | 1.410 (5) |

|             |            |           |           |
|-------------|------------|-----------|-----------|
| C(12) C(13) | 1.379 (4)  | C(5) C(6) | 1.405 (5) |
| Br(1) Fe(1) | 2.4196 (5) | C(6) C(7) | 1.398 (5) |
| Fe(1) C(1)  | 1.783 (3)  |           |           |

**Table 6.3 Bond Angles for 4\_\_DITFB\_CpFeBr.**

| Atom Atom Atom    | Angle/°     | Atom Atom Atom   | Angle/°     |
|-------------------|-------------|------------------|-------------|
| C(9) C(8) C(13)   | 117.0 (2)   | C(5) Fe(1) C(7)  | 66.15 (13)  |
| C(9) C(8) I(1)    | 120.30 (19) | C(1) Fe(1) C(6)  | 130.26 (14) |
| C(13) C(8) I(1)   | 122.7 (2)   | C(2) Fe(1) C(6)  | 133.54 (13) |
| F(1) C(9) C(8)    | 120.4 (2)   | C(3) Fe(1) C(6)  | 65.83 (15)  |
| F(1) C(9) C(10)   | 118.0 (2)   | C(4) Fe(1) C(6)  | 65.65 (14)  |
| C(8) C(9) C(10)   | 121.6 (2)   | C(5) Fe(1) C(6)  | 39.13 (13)  |
| F(2) C(10) C(11)  | 120.4 (2)   | C(7) Fe(1) C(6)  | 38.85 (13)  |
| F(2) C(10) C(9)   | 118.0 (2)   | C(1) Fe(1) Br(1) | 90.18 (10)  |
| C(11) C(10) C(9)  | 121.5 (2)   | C(2) Fe(1) Br(1) | 89.76 (10)  |
| C(10) C(11) C(12) | 116.9 (2)   | C(3) Fe(1) Br(1) | 149.63 (10) |
| C(10) C(11) I(2)  | 121.23 (19) | C(4) Fe(1) Br(1) | 145.83 (10) |
| C(12) C(11) I(2)  | 121.87 (19) | C(5) Fe(1) Br(1) | 106.53 (10) |
| F(3) C(12) C(13)  | 118.3 (2)   | C(7) Fe(1) Br(1) | 109.84 (10) |
| F(3) C(12) C(11)  | 120.3 (2)   | C(6) Fe(1) Br(1) | 89.95 (10)  |
| C(13) C(12) C(11) | 121.4 (2)   | O(1) C(1) Fe(1)  | 178.6 (3)   |
| F(4) C(13) C(12)  | 118.1 (2)   | O(2) C(2) Fe(1)  | 177.6 (3)   |
| F(4) C(13) C(8)   | 120.4 (2)   | C(4) C(3) C(7)   | 107.7 (3)   |
| C(12) C(13) C(8)  | 121.5 (2)   | C(4) C(3) Fe(1)  | 70.23 (18)  |
| C(1) Fe(1) C(2)   | 96.20 (14)  | C(7) C(3) Fe(1)  | 70.97 (19)  |
| C(1) Fe(1) C(3)   | 92.12 (14)  | C(3) C(4) C(5)   | 108.5 (3)   |
| C(2) Fe(1) C(3)   | 120.03 (14) | C(3) C(4) Fe(1)  | 70.21 (18)  |
| C(1) Fe(1) C(4)   | 123.70 (14) | C(5) C(4) Fe(1)  | 70.77 (18)  |
| C(2) Fe(1) C(4)   | 90.70 (14)  | C(6) C(5) C(4)   | 107.2 (3)   |
| C(3) Fe(1) C(4)   | 39.57 (13)  | C(6) C(5) Fe(1)  | 71.16 (18)  |
| C(1) Fe(1) C(5)   | 158.46 (14) | C(4) C(5) Fe(1)  | 69.61 (18)  |
| C(2) Fe(1) C(5)   | 97.34 (13)  | C(7) C(6) C(5)   | 109.1 (3)   |
| C(3) Fe(1) C(5)   | 66.57 (13)  | C(7) C(6) Fe(1)  | 70.14 (19)  |
| C(4) Fe(1) C(5)   | 39.62 (14)  | C(5) C(6) Fe(1)  | 69.71 (18)  |
| C(1) Fe(1) C(7)   | 95.75 (14)  | C(6) C(7) C(3)   | 107.5 (3)   |
| C(2) Fe(1) C(7)   | 156.95 (14) | C(6) C(7) Fe(1)  | 71.00 (19)  |
| C(3) Fe(1) C(7)   | 39.81 (14)  | C(3) C(7) Fe(1)  | 69.22 (18)  |
| C(4) Fe(1) C(7)   | 66.29 (13)  |                  |             |

**Complex 5 CpFe(CO)<sub>2</sub>I---p-DITFB****Table 7.1 Crystal data and structure refinement for 5.**

|                                             |                                                                               |
|---------------------------------------------|-------------------------------------------------------------------------------|
| Identification code                         | 1                                                                             |
| Empirical formula                           | C <sub>10</sub> H <sub>5</sub> F <sub>2</sub> FeI <sub>2</sub> O <sub>2</sub> |
| Formula weight                              | 504.79                                                                        |
| Temperature/K                               | 150.0                                                                         |
| Crystal system                              | triclinic                                                                     |
| Space group                                 | P-1                                                                           |
| a/Å                                         | 8.0151(4)                                                                     |
| b/Å                                         | 8.2003(5)                                                                     |
| c/Å                                         | 10.3911(6)                                                                    |
| α/°                                         | 105.4770(10)                                                                  |
| β/°                                         | 93.4690(10)                                                                   |
| γ/°                                         | 95.4210(10)                                                                   |
| Volume/Å <sup>3</sup>                       | 652.64(6)                                                                     |
| Z                                           | 2                                                                             |
| ρ <sub>calc</sub> /cm <sup>3</sup>          | 2.569                                                                         |
| μ/mm <sup>-1</sup>                          | 5.895                                                                         |
| F(000)                                      | 462.0                                                                         |
| Crystal size/mm <sup>3</sup>                | 0.4 × 0.4 × 0.2                                                               |
| Radiation                                   | MoKα (λ = 0.71073)                                                            |
| 2θ range for data collection/°              | 5.126 to 58                                                                   |
| Index ranges                                | -10 ≤ h ≤ 10, -11 ≤ k ≤ 11, -14 ≤ l ≤ 14                                      |
| Reflections collected                       | 6084                                                                          |
| Independent reflections                     | 3371 [R <sub>int</sub> = 0.0258, R <sub>sigma</sub> = 0.0365]                 |
| Data/restraints/parameters                  | 3371/0/154                                                                    |
| Goodness-of-fit on F <sup>2</sup>           | 1.059                                                                         |
| Final R indexes [I >= 2σ (I)]               | R <sub>1</sub> = 0.0258, wR <sub>2</sub> = 0.0654                             |
| Final R indexes [all data]                  | R <sub>1</sub> = 0.0275, wR <sub>2</sub> = 0.0665                             |
| Largest diff. peak/hole / e Å <sup>-3</sup> | 0.69/-1.75                                                                    |

**Table 7.2 Bond Lengths for 5.**

| Atom  | Atom  | Length/Å   | Atom  | Atom              | Length/Å  |
|-------|-------|------------|-------|-------------------|-----------|
| I(2)  | C(8)  | 2.090 (3)  | O(2)  | C(2)              | 1.136 (4) |
| I(1)  | Fe(1) | 2.6025 (4) | C(10) | C(9) <sup>1</sup> | 1.375 (4) |
| Fe(1) | C(1)  | 1.782 (3)  | C(10) | C(8)              | 1.375 (4) |
| Fe(1) | C(2)  | 1.775 (3)  | C(10) | F(2)              | 1.347 (3) |
| Fe(1) | C(6)  | 2.071 (3)  | C(9)  | C(8)              | 1.395 (3) |
| Fe(1) | C(5)  | 2.073 (3)  | C(6)  | C(5)              | 1.401 (5) |
| Fe(1) | C(4)  | 2.091 (3)  | C(6)  | C(7)              | 1.421 (5) |
| Fe(1) | C(3)  | 2.115 (3)  | C(5)  | C(4)              | 1.422 (5) |
| Fe(1) | C(7)  | 2.106 (3)  | C(4)  | C(3)              | 1.418 (5) |
| F(1)  | C(9)  | 1.345 (3)  | C(3)  | C(7)              | 1.397 (5) |
| C(1)  | O(1)  | 1.138 (4)  |       |                   |           |



**Table 7.3 Bond Angles for 5.**

| Atom | Atom  | Atom | Angle/°     | Atom               | Atom  | Atom               | Angle/°     |
|------|-------|------|-------------|--------------------|-------|--------------------|-------------|
| C(1) | Fe(1) | I(1) | 92.30 (10)  | C(7)               | Fe(1) | C(3)               | 38.65 (14)  |
| C(1) | Fe(1) | C(6) | 93.70 (14)  | O(1)               | C(1)  | Fe(1)              | 177.2 (3)   |
| C(1) | Fe(1) | C(5) | 127.59 (15) | C(9) <sup>1</sup>  | C(10) | C(8)               | 121.9 (2)   |
| C(1) | Fe(1) | C(4) | 158.44 (14) | F(2)               | C(10) | C(9) <sup>1</sup>  | 118.2 (2)   |
| C(1) | Fe(1) | C(3) | 125.29 (15) | F(2)               | C(10) | C(8)               | 119.9 (2)   |
| C(1) | Fe(1) | C(7) | 93.05 (14)  | O(2)               | C(2)  | Fe(1)              | 177.6 (3)   |
| C(2) | Fe(1) | I(1) | 90.21 (9)   | F(1)               | C(9)  | C(10) <sup>1</sup> | 118.6 (2)   |
| C(2) | Fe(1) | C(1) | 93.87 (16)  | F(1)               | C(9)  | C(8)               | 120.4 (3)   |
| C(2) | Fe(1) | C(6) | 114.95 (13) | C(10) <sup>1</sup> | C(9)  | C(8)               | 120.9 (2)   |
| C(2) | Fe(1) | C(5) | 90.13 (14)  | C(10)              | C(8)  | I(2)               | 122.05 (19) |
| C(2) | Fe(1) | C(4) | 102.58 (16) | C(10)              | C(8)  | C(9)               | 117.1 (3)   |
| C(2) | Fe(1) | C(3) | 140.80 (16) | C(9)               | C(8)  | I(2)               | 120.8 (2)   |
| C(2) | Fe(1) | C(7) | 154.23 (13) | C(5)               | C(6)  | Fe(1)              | 70.32 (17)  |
| C(6) | Fe(1) | I(1) | 153.61 (9)  | C(5)               | C(6)  | C(7)               | 107.9 (3)   |
| C(6) | Fe(1) | C(5) | 39.51 (15)  | C(7)               | C(6)  | Fe(1)              | 71.42 (17)  |
| C(6) | Fe(1) | C(4) | 66.83 (14)  | C(6)               | C(5)  | Fe(1)              | 70.18 (18)  |
| C(6) | Fe(1) | C(3) | 65.85 (12)  | C(6)               | C(5)  | C(4)               | 108.6 (3)   |
| C(6) | Fe(1) | C(7) | 39.76 (13)  | C(4)               | C(5)  | Fe(1)              | 70.72 (17)  |
| C(5) | Fe(1) | I(1) | 139.98 (11) | C(5)               | C(4)  | Fe(1)              | 69.35 (18)  |
| C(5) | Fe(1) | C(4) | 39.93 (15)  | C(3)               | C(4)  | Fe(1)              | 71.22 (18)  |
| C(5) | Fe(1) | C(3) | 65.88 (13)  | C(3)               | C(4)  | C(5)               | 106.7 (3)   |
| C(5) | Fe(1) | C(7) | 66.18 (13)  | C(4)               | C(3)  | Fe(1)              | 69.39 (18)  |
| C(4) | Fe(1) | I(1) | 101.38 (10) | C(7)               | C(3)  | Fe(1)              | 70.30 (17)  |
| C(4) | Fe(1) | C(3) | 39.39 (15)  | C(7)               | C(3)  | C(4)               | 109.0 (3)   |
| C(4) | Fe(1) | C(7) | 66.19 (14)  | C(6)               | C(7)  | Fe(1)              | 68.82 (16)  |
| C(3) | Fe(1) | I(1) | 89.86 (9)   | C(3)               | C(7)  | Fe(1)              | 71.06 (18)  |
| C(7) | Fe(1) | I(1) | 114.27 (9)  | C(3)               | C(7)  | C(6)               | 107.8 (3)   |

**Complex 6 (Me<sub>4</sub>C<sub>4</sub>)Co(CO)<sub>2</sub>I---*p*-DITFB****Table 8.1 Crystal data and structure refinement for 6.**

|                                             |                                                                                |
|---------------------------------------------|--------------------------------------------------------------------------------|
| Identification code                         | 6__DITFB_CbCoCO2I                                                              |
| Empirical formula                           | C <sub>16</sub> H <sub>12</sub> CoF <sub>4</sub> I <sub>3</sub> O <sub>2</sub> |
| Formula weight                              | 751.89                                                                         |
| Temperature/K                               | 100(2)                                                                         |
| Crystal system                              | Monoclinic                                                                     |
| Space group                                 | P2 <sub>1</sub> /c                                                             |
| a/Å                                         | 14.137(5)                                                                      |
| b/Å                                         | 10.691(3)                                                                      |
| c/Å                                         | 13.803(4)                                                                      |
| α/°                                         | 90                                                                             |
| β/°                                         | 95.373(5)                                                                      |
| γ/°                                         | 90                                                                             |
| Volume/Å <sup>3</sup>                       | 2077.0(11)                                                                     |
| Z                                           | 4                                                                              |
| ρ <sub>calc</sub> /g/cm <sup>3</sup>        | 2.405                                                                          |
| μ/mm <sup>-1</sup>                          | 5.327                                                                          |
| F(000)                                      | 1384.0                                                                         |
| Crystal size/mm <sup>3</sup>                | 0.500 × 0.200 × 0.050                                                          |
| Radiation                                   | MoKα (λ = 0.71073)                                                             |
| 2θ range for data collection/°              | 2.894 to 57.994                                                                |
| Index ranges                                | -19 ≤ h ≤ 19, 0 ≤ k ≤ 14, 0 ≤ l ≤ 18                                           |
| Reflections collected                       | 5517                                                                           |
| Independent reflections                     | 5517 [R <sub>int</sub> = ?, R <sub>sigma</sub> = 0.0307]                       |
| Data/restraints/parameters                  | 5517/0/240                                                                     |
| Goodness-of-fit on F <sup>2</sup>           | 1.086                                                                          |
| Final R indexes [I ≥ 2σ (I)]                | R <sub>1</sub> = 0.0383, wR <sub>2</sub> = 0.0953                              |
| Final R indexes [all data]                  | R <sub>1</sub> = 0.0430, wR <sub>2</sub> = 0.1021                              |
| Largest diff. peak/hole / e Å <sup>-3</sup> | 4.72/-1.75                                                                     |

**Table 8.2 Bond Lengths for 6\_\_DITFB\_CbCoCO2I.**

| Atom  | Atom  | Length/Å  | Atom  | Atom | Length/Å  |
|-------|-------|-----------|-------|------|-----------|
| I(2)  | C(11) | 2.108(6)  | Co(1) | C(4) | 2.035(6)  |
| I(3)  | C(14) | 2.093(7)  | Co(1) | C(3) | 2.037(7)  |
| F(1)  | C(12) | 1.352(8)  | Co(1) | C(5) | 2.049(7)  |
| F(2)  | C(13) | 1.335(8)  | Co(1) | C(6) | 2.067(7)  |
| F(3)  | C(15) | 1.338(8)  | O(1)  | C(1) | 1.117(10) |
| F(4)  | C(16) | 1.351(8)  | O(2)  | C(2) | 1.112(10) |
| C(11) | C(12) | 1.355(10) | C(3)  | C(6) | 1.446(10) |
| C(11) | C(16) | 1.404(9)  | C(3)  | C(4) | 1.465(9)  |
| C(12) | C(13) | 1.397(9)  | C(3)  | C(7) | 1.517(10) |
| C(13) | C(14) | 1.411(9)  | C(4)  | C(5) | 1.456(10) |
| C(14) | C(15) | 1.373(10) | C(4)  | C(8) | 1.517(10) |
| C(15) | C(16) | 1.398(9)  | C(5)  | C(6) | 1.453(10) |

I(1) Co(1) 2.6189(12) C(5) C(9) 1.481(10)  
 Co(1)C(1) 1.826(8) C(6) C(10) 1.478(10)  
 Co(1)C(2) 1.832(8)

**Table 8.3 Bond Angles for 6\_\_DITFB\_CbCoCO2I.**

| Atom Atom Atom  | Angle/°  | Atom Atom Atom  | Angle/°  |
|-----------------|----------|-----------------|----------|
| C(12)C(11)C(16) | 118.7(6) | C(1) Co(1) I(1) | 94.8(3)  |
| C(12)C(11)I(2)  | 123.0(5) | C(2) Co(1) I(1) | 97.4(3)  |
| C(16)C(11)I(2)  | 118.4(5) | C(4) Co(1) I(1) | 97.1(2)  |
| F(1) C(12)C(11) | 120.4(6) | C(3) Co(1) I(1) | 94.7(2)  |
| F(1) C(12)C(13) | 118.0(6) | C(5) Co(1) I(1) | 138.5(2) |
| C(11)C(12)C(13) | 121.5(6) | C(6) Co(1) I(1) | 134.5(2) |
| F(2) C(13)C(12) | 118.1(6) | O(1) C(1) Co(1) | 178.6(8) |
| F(2) C(13)C(14) | 121.7(6) | O(2) C(2) Co(1) | 176.9(8) |
| C(12)C(13)C(14) | 120.2(6) | C(6) C(3) C(4)  | 89.9(6)  |
| C(15)C(14)C(13) | 118.2(6) | C(6) C(3) C(7)  | 133.3(6) |
| C(15)C(14)I(3)  | 123.0(5) | C(4) C(3) C(7)  | 134.4(7) |
| C(13)C(14)I(3)  | 118.8(5) | C(6) C(3) Co(1) | 70.5(4)  |
| F(3) C(15)C(14) | 120.0(6) | C(4) C(3) Co(1) | 68.8(4)  |
| F(3) C(15)C(16) | 119.0(6) | C(7) C(3) Co(1) | 131.1(5) |
| C(14)C(15)C(16) | 121.0(6) | C(5) C(4) C(3)  | 89.6(6)  |
| F(4) C(16)C(15) | 117.7(6) | C(5) C(4) C(8)  | 133.5(7) |
| F(4) C(16)C(11) | 121.9(6) | C(3) C(4) C(8)  | 135.0(6) |
| C(15)C(16)C(11) | 120.4(6) | C(5) C(4) Co(1) | 69.6(4)  |
| C(1) Co(1) C(2) | 98.0(3)  | C(3) C(4) Co(1) | 69.0(4)  |
| C(1) Co(1) C(4) | 151.4(3) | C(8) C(4) Co(1) | 130.2(5) |
| C(2) Co(1) C(4) | 106.1(3) | C(6) C(5) C(4)  | 90.0(6)  |
| C(1) Co(1) C(3) | 111.0(3) | C(6) C(5) C(9)  | 133.7(7) |
| C(2) Co(1) C(3) | 147.4(3) | C(4) C(5) C(9)  | 134.1(7) |
| C(4) Co(1) C(3) | 42.2(3)  | C(6) C(5) Co(1) | 70.0(4)  |
| C(1) Co(1) C(5) | 124.1(3) | C(4) C(5) Co(1) | 68.6(4)  |
| C(2) Co(1) C(5) | 91.3(3)  | C(9) C(5) Co(1) | 131.2(5) |
| C(4) Co(1) C(5) | 41.8(3)  | C(3) C(6) C(5)  | 90.5(6)  |
| C(3) Co(1) C(5) | 60.5(3)  | C(3) C(6) C(10) | 134.7(7) |
| C(1) Co(1) C(6) | 93.3(3)  | C(5) C(6) C(10) | 133.8(7) |
| C(2) Co(1) C(6) | 125.5(3) | C(3) C(6) Co(1) | 68.3(4)  |
| C(4) Co(1) C(6) | 60.2(3)  | C(5) C(6) Co(1) | 68.7(4)  |
| C(3) Co(1) C(6) | 41.2(3)  | C(10)C(6) Co(1) | 129.2(5) |
| C(5) Co(1) C(6) | 41.3(3)  |                 |          |

**Complex 7 (Me<sub>4</sub>C<sub>4</sub>)Co(CO)<sub>2</sub>I****Table 9.1 Crystal data and structure refinement for 7**

|                                             |                                                          |
|---------------------------------------------|----------------------------------------------------------|
| Identification code                         | 7__CbCOCO2I                                              |
| Empirical formula                           | C <sub>10</sub> H <sub>12</sub> CoIO <sub>2</sub>        |
| Formula weight                              | 350.03                                                   |
| Temperature/K                               | 150(2)                                                   |
| Crystal system                              | monoclinic                                               |
| Space group                                 | P2 <sub>1</sub> /c                                       |
| a/Å                                         | 14.066(4)                                                |
| b/Å                                         | 13.931(4)                                                |
| c/Å                                         | 14.062(4)                                                |
| α/°                                         | 90                                                       |
| β/°                                         | 117.280(5)                                               |
| γ/°                                         | 90                                                       |
| Volume/Å <sup>3</sup>                       | 2449.1(13)                                               |
| Z                                           | 8                                                        |
| ρ <sub>calc</sub> /cm <sup>3</sup>          | 1.899                                                    |
| μ/mm <sup>-1</sup>                          | 3.896                                                    |
| F(000)                                      | 1344.0                                                   |
| Crystal size/mm <sup>3</sup>                | 0.400 × 0.200 × 0.100                                    |
| Radiation                                   | MoKα (λ = 0.71073)                                       |
| 2θ range for data collection/°              | 3.258 to 52.962                                          |
| Index ranges                                | -17 ≤ h ≤ 15, 0 ≤ k ≤ 17, 0 ≤ l ≤ 17                     |
| Reflections collected                       | 5093                                                     |
| Independent reflections                     | 5093 [R <sub>int</sub> = ?, R <sub>sigma</sub> = 0.0729] |
| Data/restraints/parameters                  | 5093/0/262                                               |
| Goodness-of-fit on F <sup>2</sup>           | 1.014                                                    |
| Final R indexes [I ≥ 2σ (I)]                | R <sub>1</sub> = 0.0489, wR <sub>2</sub> = 0.0901        |
| Final R indexes [all data]                  | R <sub>1</sub> = 0.0796, wR <sub>2</sub> = 0.1028        |
| Largest diff. peak/hole / e Å <sup>-3</sup> | 1.13/-1.34                                               |

**Table 9.2 Bond Lengths for 7\_\_CbCOCO2I.**

| Atom  | Atom   | Length/Å    | Atom   | Atom   | Length/Å   |
|-------|--------|-------------|--------|--------|------------|
| I(1)  | Co(1)  | 2.6062 (12) | C(4)   | C(8)   | 1.482 (10) |
| I(2)  | Co(2)  | 2.5979 (13) | O(2)   | C(2)   | 1.157 (10) |
| Co(2) | C(15)  | 1.992 (7)   | C(5)   | C(6)   | 1.442 (10) |
| Co(2) | C(2AA) | 2.046 (8)   | C(5)   | C(9)   | 1.496 (11) |
| Co(2) | C(13)  | 2.099 (8)   | O(4)   | C(12)  | 1.143 (10) |
| Co(2) | C(11)  | 1.780 (8)   | C(15)  | C(2AA) | 1.437 (11) |
| Co(2) | C(14)  | 2.019 (9)   | C(15)  | C(13)  | 2.039 (11) |
| Co(2) | C(12)  | 1.775 (9)   | C(15)  | C(14)  | 1.467 (11) |
| Co(1) | C(4)   | 2.026 (7)   | C(15)  | C(18)  | 1.476 (10) |
| Co(1) | C(5)   | 2.033 (8)   | C(2AA) | C(13)  | 1.436 (11) |
| Co(1) | C(3)   | 2.040 (8)   | C(2AA) | C(14)  | 2.031 (11) |
| Co(1) | C(6)   | 2.051 (7)   | C(2AA) | C(19)  | 1.489 (11) |
| Co(1) | C(1)   | 1.786 (9)   | C(3)   | C(6)   | 1.434 (11) |
| Co(1) | C(2)   | 1.781 (9)   | C(3)   | C(7)   | 1.487 (11) |

|      |       |           |       |       |           |
|------|-------|-----------|-------|-------|-----------|
| O(1) | C(1)  | 1.162(10) | C(6)  | C(10) | 1.481(11) |
| O(3) | C(11) | 1.146(9)  | C(13) | C(14) | 1.417(12) |
| C(4) | C(5)  | 1.445(10) | C(13) | C(16) | 1.484(11) |
| C(4) | C(3)  | 1.465(10) | C(14) | C(17) | 1.486(11) |

**Table 9.3 Bond Angles for 7\_CbCOCO2I.**

| Atom   | Atom  | Atom   | Angle/°  | Atom   | Atom   | Atom   | Angle/°  |
|--------|-------|--------|----------|--------|--------|--------|----------|
| C(15)  | Co(2) | I(2)   | 148.4(2) | C(2AA) | C(15)  | Co(2)  | 71.2(4)  |
| C(15)  | Co(2) | C(2AA) | 41.7(3)  | C(2AA) | C(15)  | C(13)  | 44.8(4)  |
| C(15)  | Co(2) | C(13)  | 59.7(3)  | C(2AA) | C(15)  | C(14)  | 88.8(6)  |
| C(15)  | Co(2) | C(14)  | 42.9(3)  | C(2AA) | C(15)  | C(18)  | 133.2(7) |
| C(2AA) | Co(2) | I(2)   | 124.1(2) | C(14)  | C(15)  | Co(2)  | 69.6(4)  |
| C(2AA) | Co(2) | C(13)  | 40.5(3)  | C(14)  | C(15)  | C(13)  | 44.0(4)  |
| C(13)  | Co(2) | I(2)   | 92.0(2)  | C(14)  | C(15)  | C(18)  | 136.5(8) |
| C(11)  | Co(2) | I(2)   | 94.7(3)  | C(18)  | C(15)  | Co(2)  | 127.4(5) |
| C(11)  | Co(2) | C(15)  | 111.9(3) | C(18)  | C(15)  | C(13)  | 169.8(6) |
| C(11)  | Co(2) | C(2AA) | 92.5(3)  | C(15)  | C(2AA) | Co(2)  | 67.2(4)  |
| C(11)  | Co(2) | C(13)  | 122.4(4) | C(15)  | C(2AA) | C(14)  | 46.2(4)  |
| C(11)  | Co(2) | C(14)  | 151.5(3) | C(15)  | C(2AA) | C(19)  | 133.4(7) |
| C(14)  | Co(2) | I(2)   | 106.6(2) | C(13)  | C(2AA) | Co(2)  | 71.7(4)  |
| C(14)  | Co(2) | C(2AA) | 59.9(3)  | C(13)  | C(2AA) | C(15)  | 90.4(6)  |
| C(14)  | Co(2) | C(13)  | 40.2(3)  | C(13)  | C(2AA) | C(14)  | 44.2(5)  |
| C(12)  | Co(2) | I(2)   | 94.5(3)  | C(13)  | C(2AA) | C(19)  | 134.4(8) |
| C(12)  | Co(2) | C(15)  | 96.2(4)  | C(14)  | C(2AA) | Co(2)  | 59.4(3)  |
| C(12)  | Co(2) | C(2AA) | 137.5(4) | C(19)  | C(2AA) | Co(2)  | 129.8(6) |
| C(12)  | Co(2) | C(13)  | 134.1(4) | C(19)  | C(2AA) | C(14)  | 170.8(7) |
| C(12)  | Co(2) | C(11)  | 102.3(4) | C(4)   | C(3)   | Co(1)  | 68.4(4)  |
| C(12)  | Co(2) | C(14)  | 94.9(4)  | C(4)   | C(3)   | C(7)   | 135.7(8) |
| C(4)   | Co(1) | I(1)   | 98.9(2)  | C(6)   | C(3)   | Co(1)  | 69.9(4)  |
| C(4)   | Co(1) | C(5)   | 41.7(3)  | C(6)   | C(3)   | C(4)   | 89.6(7)  |
| C(4)   | Co(1) | C(3)   | 42.2(3)  | C(6)   | C(3)   | C(7)   | 132.7(7) |
| C(4)   | Co(1) | C(6)   | 60.2(3)  | C(7)   | C(3)   | Co(1)  | 130.9(6) |
| C(5)   | Co(1) | I(1)   | 140.5(2) | C(5)   | C(6)   | Co(1)  | 68.7(4)  |
| C(5)   | Co(1) | C(3)   | 60.4(3)  | C(5)   | C(6)   | C(10)  | 134.0(8) |
| C(5)   | Co(1) | C(6)   | 41.4(3)  | C(3)   | C(6)   | Co(1)  | 69.1(4)  |
| C(3)   | Co(1) | I(1)   | 94.3(2)  | C(3)   | C(6)   | C(5)   | 90.8(6)  |
| C(3)   | Co(1) | C(6)   | 41.0(3)  | C(3)   | C(6)   | C(10)  | 134.0(8) |
| C(6)   | Co(1) | I(1)   | 133.2(2) | C(10)  | C(6)   | Co(1)  | 129.2(6) |
| C(1)   | Co(1) | I(1)   | 95.5(3)  | C(15)  | C(13)  | Co(2)  | 57.5(3)  |
| C(1)   | Co(1) | C(4)   | 149.9(3) | C(2AA) | C(13)  | Co(2)  | 67.7(4)  |
| C(1)   | Co(1) | C(5)   | 120.7(3) | C(2AA) | C(13)  | C(15)  | 44.8(5)  |
| C(1)   | Co(1) | C(3)   | 110.6(3) | C(2AA) | C(13)  | C(16)  | 134.6(9) |
| C(1)   | Co(1) | C(6)   | 90.8(3)  | C(14)  | C(13)  | Co(2)  | 66.9(5)  |
| C(2)   | Co(1) | I(1)   | 94.3(3)  | C(14)  | C(13)  | C(15)  | 46.0(4)  |
| C(2)   | Co(1) | C(4)   | 103.7(4) | C(14)  | C(13)  | C(2AA) | 90.8(6)  |
| C(2)   | Co(1) | C(5)   | 93.3(4)  | C(14)  | C(13)  | C(16)  | 134.0(9) |
| C(2)   | Co(1) | C(3)   | 145.8(4) | C(16)  | C(13)  | Co(2)  | 129.5(6) |

|       |             |           |       |       |        |            |
|-------|-------------|-----------|-------|-------|--------|------------|
| C(2)  | Co(1) C(6)  | 129.8 (4) | C(16) | C(13) | C(15)  | 173.0 (6)  |
| C(2)  | Co(1) C(1)  | 101.4 (4) | O(1)  | C(1)  | Co(1)  | 178.1 (8)  |
| C(5)  | C(4) Co(1)  | 69.4 (4)  | O(3)  | C(11) | Co(2)  | 179.1 (8)  |
| C(5)  | C(4) C(3)   | 89.5 (6)  | Co(2) | C(14) | C(2AA) | 60.7 (3)   |
| C(5)  | C(4) C(8)   | 133.0 (7) | C(15) | C(14) | Co(2)  | 67.5 (4)   |
| C(3)  | C(4) Co(1)  | 69.4 (5)  | C(15) | C(14) | C(2AA) | 45.0 (4)   |
| C(3)  | C(4) C(8)   | 135.9 (8) | C(15) | C(14) | C(17)  | 132.6 (8)  |
| C(8)  | C(4) Co(1)  | 129.3 (5) | C(13) | C(14) | Co(2)  | 72.9 (5)   |
| C(4)  | C(5) Co(1)  | 68.9 (4)  | C(13) | C(14) | C(15)  | 90.0 (6)   |
| C(4)  | C(5) C(9)   | 133.4 (7) | C(13) | C(14) | C(2AA) | 45.0 (5)   |
| C(6)  | C(5) Co(1)  | 70.0 (5)  | C(13) | C(14) | C(17)  | 135.7 (8)  |
| C(6)  | C(5) C(4)   | 90.1 (7)  | C(17) | C(14) | Co(2)  | 128.3 (7)  |
| C(6)  | C(5) C(9)   | 134.9 (7) | C(17) | C(14) | C(2AA) | 170.8 (8)  |
| C(9)  | C(5) Co(1)  | 129.6 (6) | O(2)  | C(2)  | Co(1)  | 179.7 (10) |
| Co(2) | C(15) C(13) | 62.8 (3)  | O(4)  | C(12) | Co(2)  | 179.2 (9)  |
